# Supplementary material for: Astragaloside IV in the Treatment of Memory Impairment – the In Silico Studies with the In Vivo Analysis and Post-mortem ADME Profiling on Mice
Source: Preprints.org preprint supplement (doi:10.20944/preprints202308.1435.v1), 2023-08-21
Supplement: Supplementary file 1 [file supplementary]

| Name | mutagenic | tumorigenic | irritant | reproductive effective |
| --- | --- | --- | --- | --- |
| A I |  |  |  |  |
| A II |  |  |  |  |
| A III |  |  |  |  |
| A IV |  |  |  |  |

no risk
